# Supplementary material for: Can Plot-Level Photographs Accurately Estimate Tundra Vegetation Cover in Northern Alaska?
Source: MDPI journal article supplement (doi:10.3390/rs15081972), 2023-04-08
Supplement: s1 [file s1]

**Table S1.** Vegetation sampling dates using the point frame and plot-level photography (Jul = July; Aug = August). Camera specifications, including model and pixel resolution, are summarized. Photographs were substituted on occasion as noted.

| Year | Point Frame<br>Dates | Photography<br>Date | Camera Specifications |             | Photo Substitutions |        |                 |
|------|----------------------|---------------------|-----------------------|-------------|---------------------|--------|-----------------|
|      |                      |                     | Model                 | Resolution  | No.                 | Date   | Reason          |
| 2012 | Jul 26 - Jul 30      | Aug 4               | Panasonic DMC-TS3     | 4320 x 3240 | 4                   | Jul 9  | Blurry          |
| 2013 | Jul 20 - Jul 29      | Jul 30              | Panasonic DMC-TS3     | 4320 x 3240 | 2                   | Jul 16 | Blurry, missing |
| 2014 | Jul 21 - Jul 29      | Aug 17              | Panasonic DMC-TS3     | 4320 x 3240 | 6                   | Jul 28 | Blurry, missing |
| 2015 | Jul 26 - Jul 30      | Jul 8               | Panasonic DMC-TS3     | 4320 x 3240 | -                   | -      | -               |
| 2018 | Jul 26 - Aug 9 *     | Jul 29              | Nikon Coolpix AW120   | 4608 x 3456 | 1                   | Aug 6  | Distortion      |
| 2019 | Jul 25 - Aug 6       | Aug 2               | Nikon Coolpix AW120   | 4608 x 3456 | 3                   | Jul 25 | Blurry, missing |
| 2021 | Jul 26 - Aug 7       | Aug 7               | Panasonic DMC-TS3     | 4320 x 3240 | 2                   | Jul 22 | Blurry          |

\* Plot H4 was sampled on August 26
