# Supplementary material for: Can Plot-Level Photographs Accurately Estimate Tundra Vegetation Cover in Northern Alaska?
Source: MDPI journal article supplement (doi:10.3390/rs15081972), 2023-04-08
Supplement: s1 [file s1]

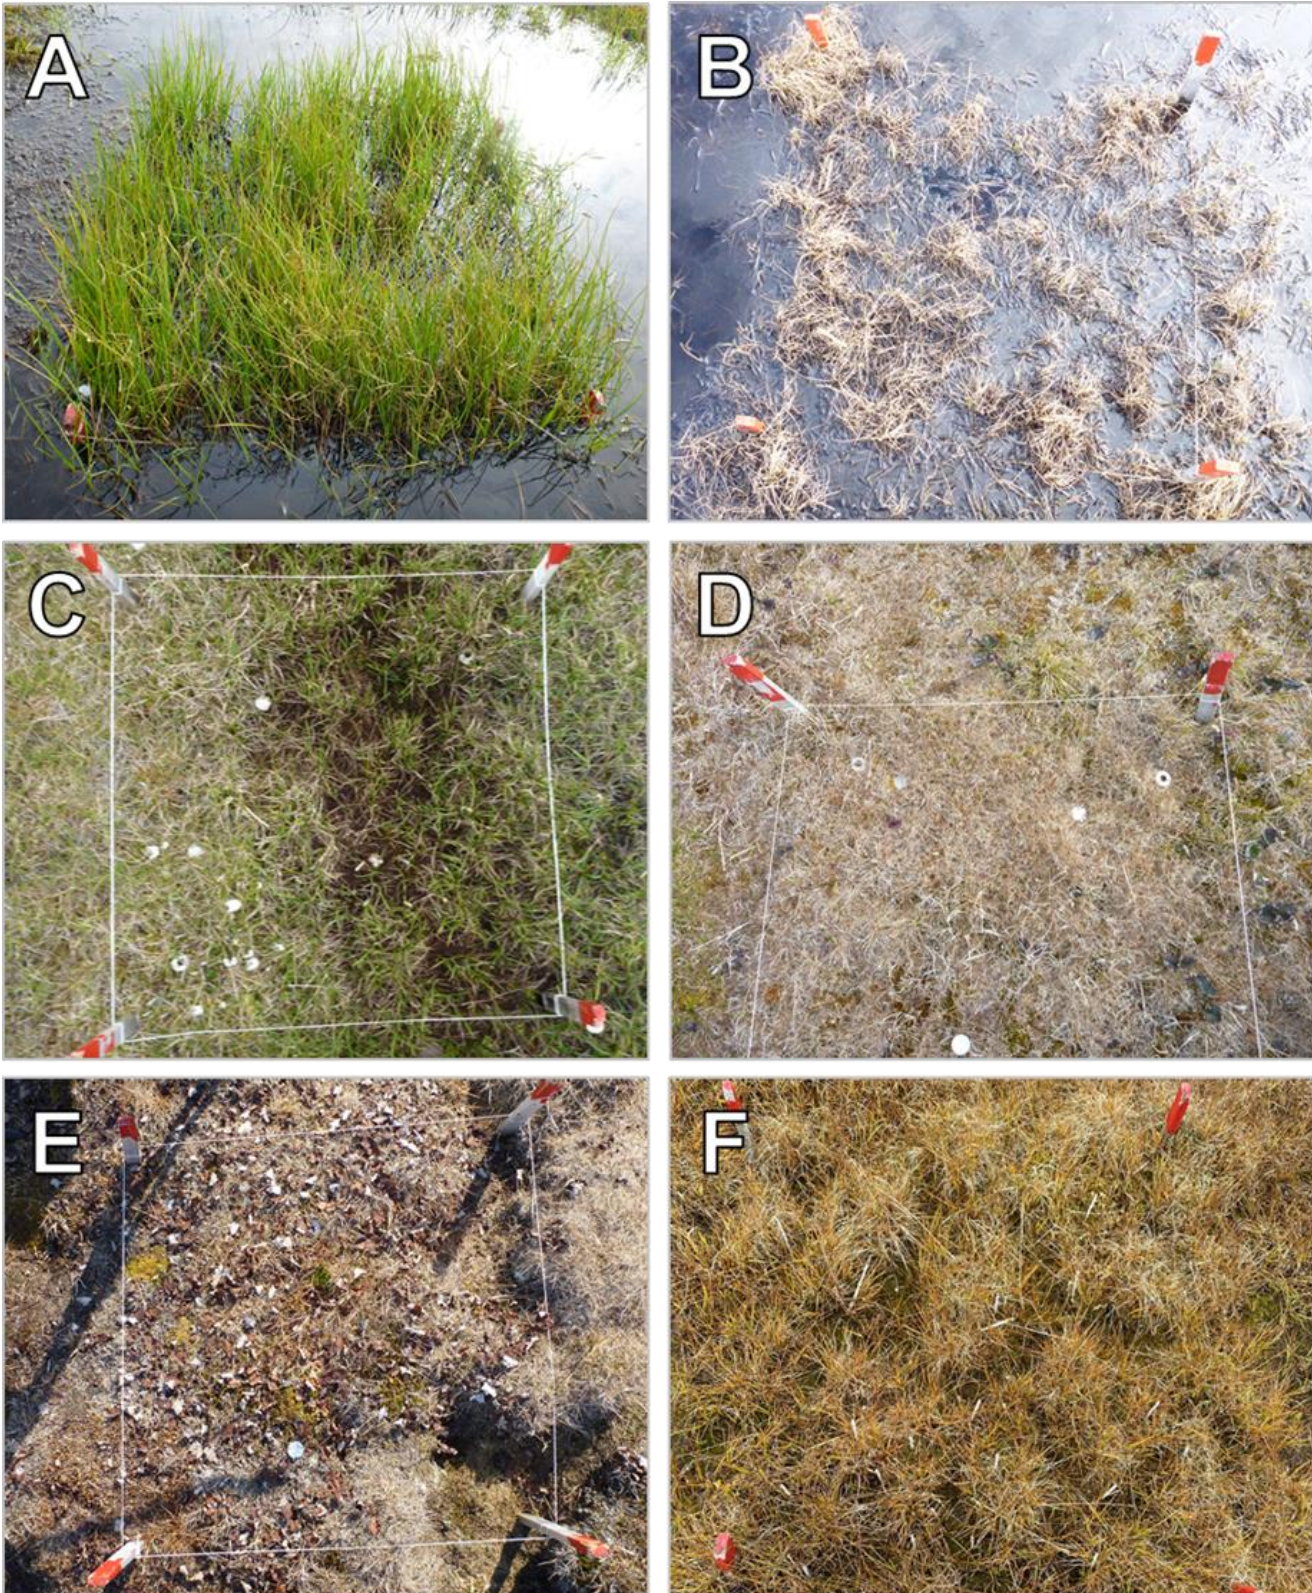

**Figure S1.** Examples of unacceptable plot-level photographs. The most common reasons to replace a photograph were (A) poor camera angle, (B) discoloration and edge distortion from direct sunlight, (C) blurriness, and (D) plot was not fully visible. If the plot was sampled too early (E) or too late in the season (F), then the images were not analyzed because the vegetation was not at peak greenness. Other issues with photographs include: missing plots, low resolution photographs, extensive areas of shadow (generally due to low solar angles and direct sunlight), and snow or standing water that obscures vegetation.
