# Supplementary material for: Can Plot-Level Photographs Accurately Estimate Tundra Vegetation Cover in Northern Alaska?
Source: MDPI journal article supplement (doi:10.3390/rs15081972), 2023-04-08
Supplement: s1 [file s1]

Archive with 8 entries (8 files):
- Figure_S1.pdf
- Figure_S2.pdf
- Figure_S3.pdf
- Figure_S4.pdf
- Table_S1.pdf
- Table_S2.pdf
- Table_S3.pdf
- Table_S4.pdf
