# Supplementary material for: Can Plot-Level Photographs Accurately Estimate Tundra Vegetation Cover in Northern Alaska?
Source: MDPI journal article supplement (doi:10.3390/rs15081972), 2023-04-08
Supplement: s1 [file s1 › Figure_S2.pdf]

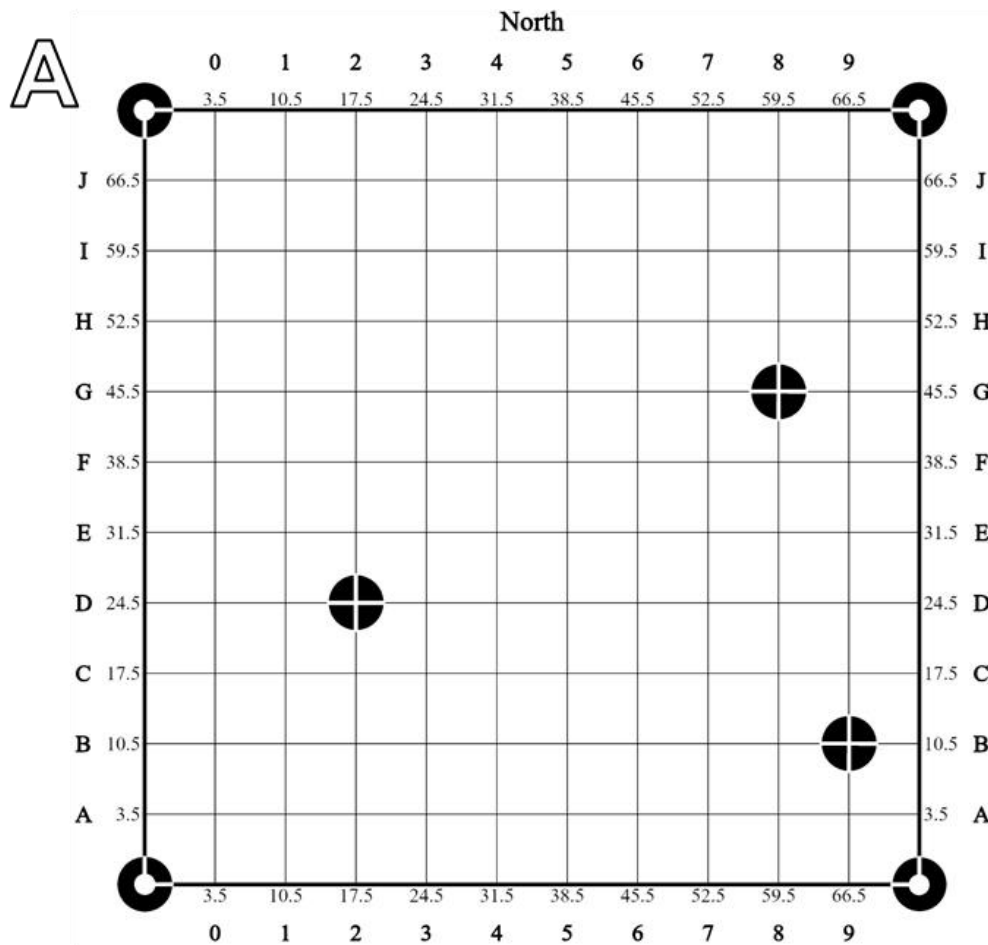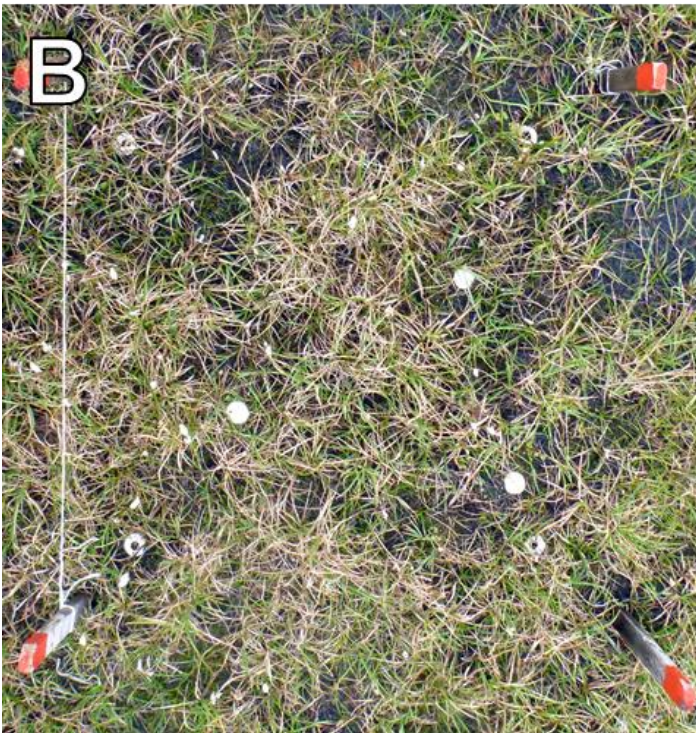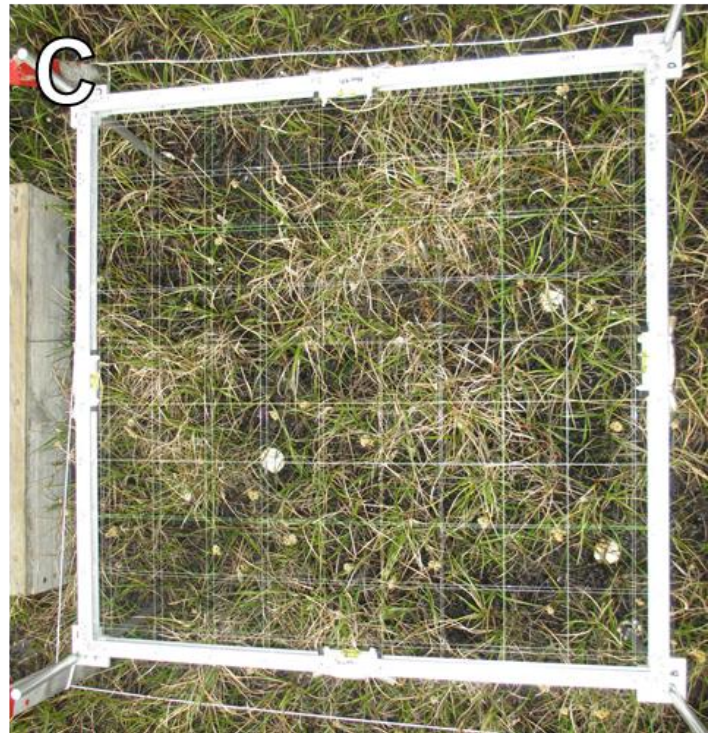

**Figure S2.** Image of a plot. (A) Field diagram shows the arrangement of the permanent tags in plot H2. (B) Plot H2 was photographed on July 30, 2013. The permanent tags in the plots, along with the corner stakes, were used to correct the orientation of the image during the georeferencing procedure. (C) The point frame was aligned using the permanent tags prior to point frame vegetation sampling on July 29, 2014.
