# Supplementary material for: Can Plot-Level Photographs Accurately Estimate Tundra Vegetation Cover in Northern Alaska?
Source: MDPI journal article supplement (doi:10.3390/rs15081972), 2023-04-08
Supplement: s1 [file s1 › Figure_S3.pdf]

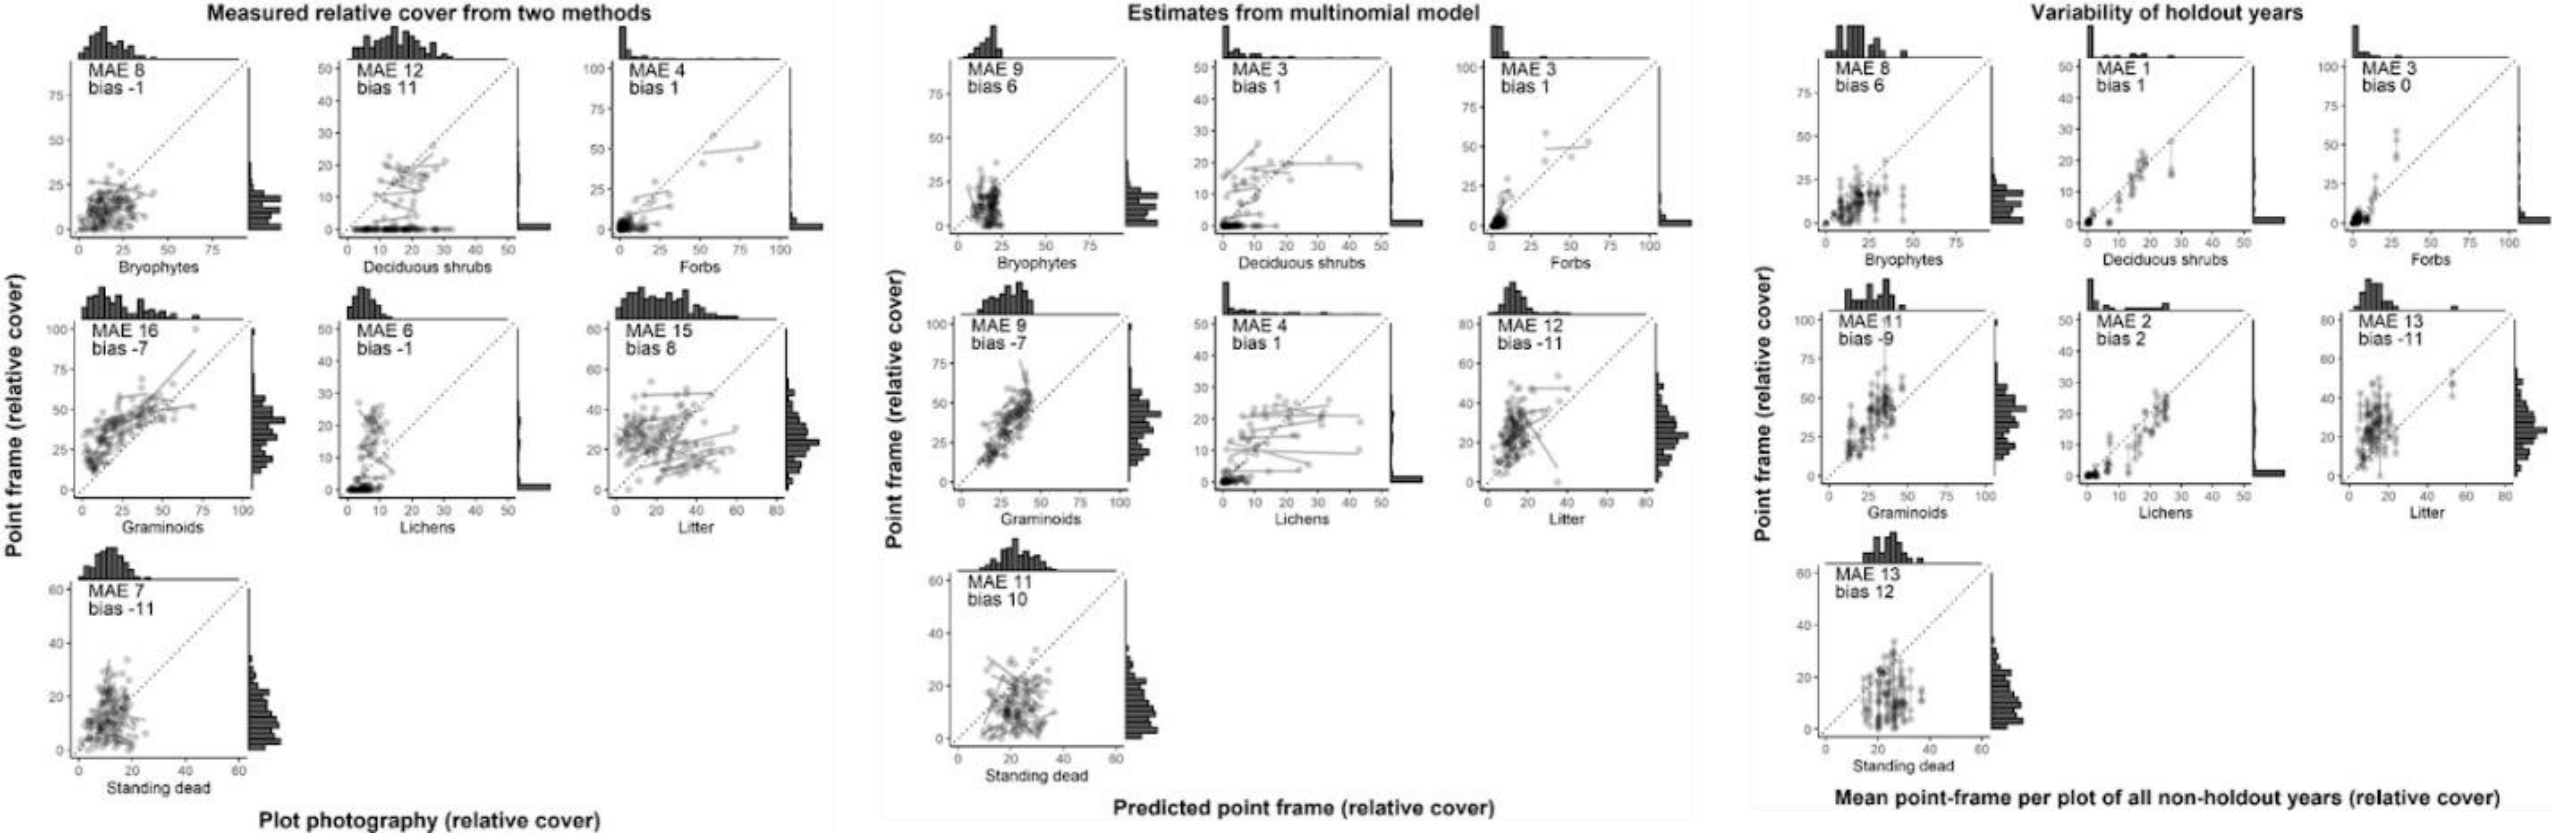

**Figure S3.** Model performance predicting the point frame cover in holdout years from image-based estimates for each class (Bryophytes, Deciduous shrubs, Forbs, Graminoids, Lichens, Litter, and Standing dead). The maximum likelihood model was developed with all plots sampled in the first three years and applied on the last four years (center); lines represent the predicted point frame cover based on plot-level photography for each plot. The original estimates are provided for the holdout years for comparison (left); lines represent the correlation between methods for each plot. The variability of the cover in the holdout years is represented as the point frame proportion compared against the mean of each plot for the non-holdout years (right); lines represent each plot. Each point represents a plot during one sampling year. Histograms on each axis show the distribution of values. Insets within each panel illustrate model performance using mean absolute error (MAE) and bias. The 1:1 reference line is included as a visual aid.
