# Supplementary material for: Can Plot-Level Photographs Accurately Estimate Tundra Vegetation Cover in Northern Alaska?
Source: MDPI journal article supplement (doi:10.3390/rs15081972), 2023-04-08
Supplement: s1 [file s1 › Figure_S4.pdf]

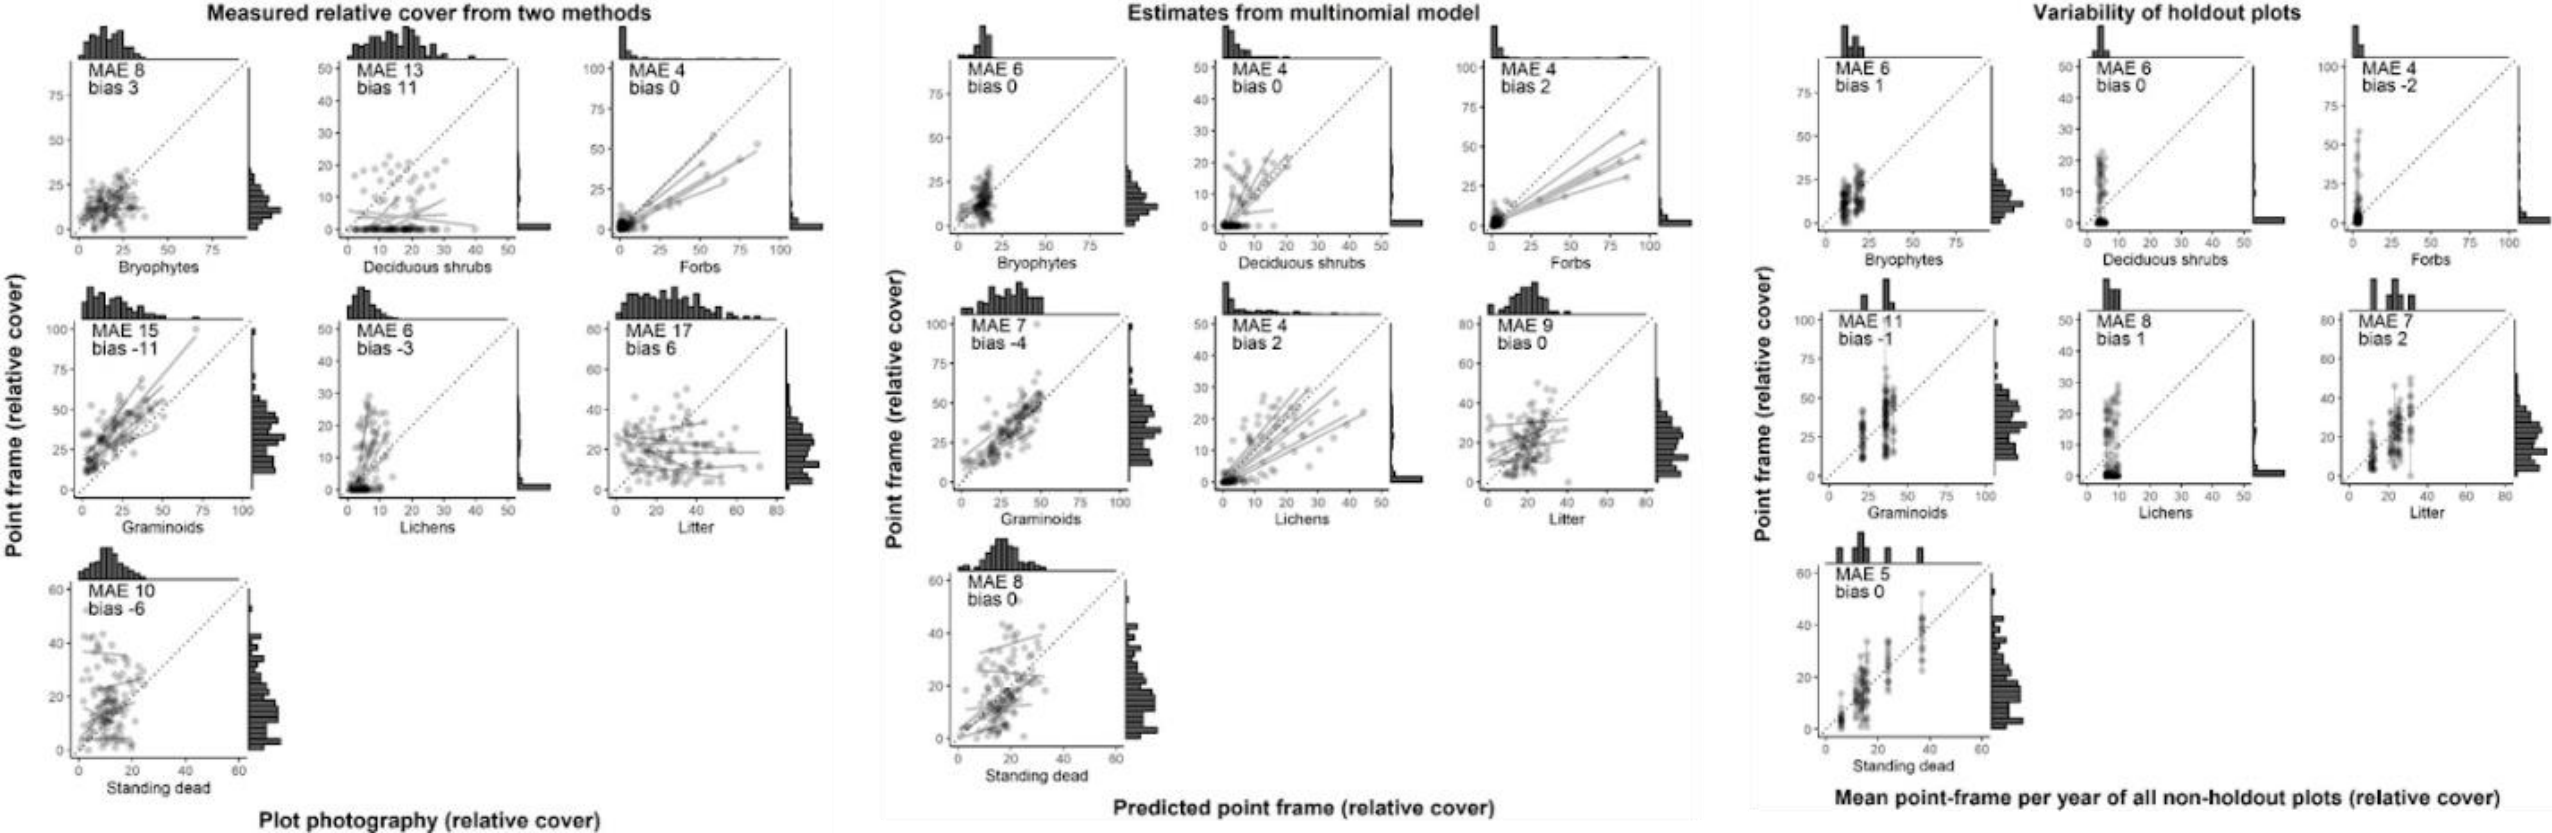

**Figure S4.** Model performance predicting the point frame cover in holdout plots from image-based estimates for each class (Bryophytes, Deciduous shrubs, Forbs, Graminoids, Lichens, Litter, and Standing dead). The maximum likelihood model was developed with 13 plots sampled in all years and applied on the remaining 17 holdout plots (center); lines represent the predicted point frame cover based on plot-level photography for each plot. The original estimates are provided for the holdout plots for comparison (left); lines represent the correlation between methods for each plot. The variability of the holdout plots is represented as the point frame cover compared against the mean of all non-holdout plots for each years (right); lines represent each year. Each point represents a plot during one sampling year. Histograms on each axis show the distribution of values. Insets within each panel illustrate model performance using mean absolute error (MAE) and bias. The 1:1 reference line is included as a visual aid.
