# Supplementary material for: Can Plot-Level Photographs Accurately Estimate Tundra Vegetation Cover in Northern Alaska?
Source: MDPI journal article supplement (doi:10.3390/rs15081972), 2023-04-08
Supplement: s1 [file s1 › Table_S2.pdf]

**Table S2.** List of machine learning models applied to the labeled data set (n = 15,000 image objects). R package, dependent libraries, preprocessing requirements, and final tuning parameters are also summarized. Data were centered and scaled (CS). Near zero variance predictors were identified and removed (NZV). Data were down-sampled to adjust for class imbalance.

| Model                                                | Preprocess | Tuning Parameters |                      |            |
|------------------------------------------------------|------------|-------------------|----------------------|------------|
|                                                      |            | Code              | Definition           | Final      |
| <b>Random Forest (RF)</b>                            | None       | mtry              | Number of predictors | 20         |
| Package=ranger with libraries (e1071, ranger, dplyr) |            | splitrule         | Splitting rule       | extratrees |
|                                                      |            | min.node.size     | Minimum node size    | 1          |
| <b>Stochastic Gradient Boosting (GBM)</b>            | None       | n.trees           | Number of trees      | 50         |
| Package=gbm with libraries (gbm, plyr)               |            | interaction.depth | Tree complexity      | 3          |
|                                                      |            | shrinkage         | Learning rate        | 0.1        |
|                                                      |            | n.minobsinnode    | Minimum node size    | 10         |
| <b>Classification and Regression Tree (CART)</b>     | None       | cp                | Complexity parameter | 0.0030198  |
| Package=rpart with library (rpart)                   |            |                   |                      |            |
| <b>Support Vector Machine (SVM)</b>                  | CS         | sigma             | Sigma                | 0.0445839  |
| Package=svmRadial with library (kernlab)             |            | C                 | Cost                 | 4          |
| <b>K-Nearest Neighbor (KNN)</b>                      | CS, NZV    | k                 | Number of neighbors  | 15         |
| Package=knn                                          |            |                   |                      |            |
