# Supplementary material for: Can Plot-Level Photographs Accurately Estimate Tundra Vegetation Cover in Northern Alaska?
Source: MDPI journal article supplement (doi:10.3390/rs15081972), 2023-04-08
Supplement: s1 [file s1 › Table_S4.pdf]

**Table S4.** Amount of positional error in each plot-level photograph as a result of the first order polynomial (affline) transformation during the georeferencing procedure. At least four ground control points (GCP) were applied to register the location of each image. Root mean square sum of all the residuals, also known as the total error or root mean square error (RMSE), is expressed in centimeters. Mean ( $\bar{x}$ ) and standard deviation (SD) are also reported.

| Plot      | Ground Control Points (GCP) |      |      |      |      |      |      | Root Mean Square Error (RMSE, cm) |      |      |      |      |      |      |
|-----------|-----------------------------|------|------|------|------|------|------|-----------------------------------|------|------|------|------|------|------|
|           | 2012                        | 2013 | 2014 | 2015 | 2018 | 2019 | 2021 | 2012                              | 2013 | 2014 | 2015 | 2018 | 2019 | 2021 |
| D2        | 16                          | 4    | 15   | 14   | 8    | 7    | 6    | 1.4                               | 1.8  | 1.1  | 3.6  | 4.2  | 2.5  | 3.0  |
| D3        | 15                          | 4    | 15   | 15   | 11   | 10   | 9    | 1.0                               | 2.3  | 1.1  | 3.3  | 3.4  | 2.8  | 1.9  |
| D4        | 15                          | 4    | 18   | 17   | 16   | 15   | 15   | 1.4                               | 2.6  | 1.3  | 3.7  | 5.4  | 5.8  | 2.4  |
| D5        | 8                           | 4    | 7    | 5    | 4    | 4    | 4    | 0.8                               | 0.2  | 5.0  | 6.2  | 3.8  | 3.0  | 2.4  |
| D6        | 8                           | 4    | 4    | 4    | 5    | 5    | 4    | 1.4                               | 2.8  | 6.1  | 5.4  | 5.0  | 3.8  | 1.7  |
| D7        | 13                          | 4    | 11   | 8    | 4    | 4    | 4    | 1.0                               | 2.2  | 2.0  | 3.7  | 2.6  | 2.1  | 1.2  |
| E2        | 15                          | 4    | 14   | 15   | 10   | 10   | 11   | 1.3                               | 1.5  | 1.7  | 2.5  | 1.6  | 3.1  | 2.5  |
| E3        | 10                          | 4    | 9    | 7    | 6    | 6    | 6    | 1.7                               | 0.9  | 2.3  | 2.8  | 5.4  | 3.2  | 4.5  |
| E4        | 12                          | 4    | 9    | 6    | 9    | 5    | 4    | 1.1                               | 2.1  | 2.7  | 4.2  | 3.6  | 3.1  | 5.4  |
| E5        | 9                           | 4    | 8    | 7    | 5    | 5    | 4    | 1.1                               | 1.5  | 2.4  | 4.8  | 5.4  | 2.3  | 3.9  |
| E6        | 9                           | 4    | 8    | 9    | 4    | 4    | 4    | 1.4                               | 0.2  | 2.6  | 3.5  | 4.7  | 1.1  | 2.9  |
| E7        | 15                          | 4    | 15   | 12   | 8    | 6    | 7    | 1.6                               | 3.0  | 1.7  | 3.5  | 4.5  | 3.9  | 3.0  |
| F2        | 11                          | 4    | 9    | 11   | 10   | 8    | 6    | 3.4                               | 5.3  | 1.6  | 2.9  | 6.4  | 5.7  | 4.7  |
| F3        | 8                           | 4    | 6    | 4    | 4    | 4    | 4    | 1.8                               | 1.3  | 5.7  | 4.1  | 7.2  | 9.0  | 1.3  |
| F4        | 4                           | 7    | 8    | 4    | 4    | 4    | 4    | 3.9                               | 2.8  | 4.1  | 6.5  | 5.1  | 6.7  | 4.0  |
| F5        | 4                           | 4    | 6    | 6    | 5    | 4    | 4    | 2.7                               | 3.5  | 3.2  | 2.9  | 10.8 | 3.3  | 1.4  |
| F6        | 4                           | 4    | 4    | 4    | 4    | 4    | 4    | 1.4                               | 1.5  | 1.9  | 3.5  | 1.6  | 2.5  | 0.3  |
| F7        | 4                           | 14   | 11   | 6    | 5    | 6    | 4    | 4.1                               | 1.1  | 1.6  | 3.9  | 2.2  | 3.3  | 3.5  |
| G2        | 8                           | 4    | 7    | 4    | 4    | 4    | 4    | 0.9                               | 1.8  | 5.1  | 4.5  | 4.2  | 1.6  | 1.1  |
| G3        | 7                           | 4    | 5    | 4    | 5    | 4    | 6    | 1.3                               | 0.7  | 2.3  | 5.3  | 5.2  | 2.8  | 2.9  |
| G4        | 12                          | 4    | 12   | 12   | 12   | 11   | 11   | 2.0                               | 1.9  | 2.3  | 3.8  | 4.3  | 3.7  | 3.3  |
| G5        | 4                           | 4    | 4    | 4    | 4    | 4    | 4    | 0.8                               | 2.5  | 6.2  | 5.5  | 4.9  | 3.3  | 2.1  |
| G6        | 7                           | 4    | 6    | 4    | 5    | 5    | 4    | 1.2                               | 1.0  | 1.2  | 6.2  | 4.3  | 7.3  | 2.9  |
| G7        | 4                           | 4    | 4    | 4    | 4    | 4    | 4    | 0.2                               | 2.0  | 8.8  | 6.0  | 5.9  | 2.2  | 1.0  |
| H2        | 11                          | 4    | 11   | 9    | 4    | 4    | 4    | 1.6                               | 1.1  | 4.3  | 2.8  | 2.5  | 4.5  | 1.3  |
| H3        | 5                           | 4    | 4    | 4    | 4    | 4    | 4    | 0.8                               | 0.6  | 3.4  | 5.0  | 11.5 | 6.2  | 1.8  |
| H4        | 11                          | 4    | 8    | 8    | 7    | 5    | 4    | 1.1                               | 1.1  | 2.1  | 6.3  | 5.6  | 0.9  | 2.0  |
| H5        | 13                          | 4    | 13   | 9    | 5    | 5    | 4    | 0.9                               | 1.7  | 1.7  | 4.4  | 3.3  | 1.7  | 2.0  |
| H6        | 17                          | 4    | 17   | 17   | 13   | 9    | 9    | 0.7                               | 1.9  | 1.1  | 3.9  | 2.8  | 1.1  | 0.9  |
| H7        | 5                           | 4    | 4    | 4    | 4    | 4    | 4    | 1.8                               | 1.8  | 3.8  | 6.0  | 6.8  | 0.7  | 3.5  |
| $\bar{x}$ | 9.5                         | 4.4  | 9.1  | 7.9  | 6.4  | 5.8  | 5.5  | 1.5                               | 1.8  | 3.0  | 4.4  | 4.8  | 3.4  | 2.5  |
| SD        | 4.2                         | 1.9  | 4.2  | 4.3  | 3.3  | 2.7  | 2.8  | 0.9                               | 1.0  | 1.8  | 1.2  | 2.2  | 2.0  | 1.2  |
